# Supplementary material for: Parental Awareness of Oral Health and Nutritional Behavior in Children with Congenital Heart Diseases Compared to Healthy Children
Source: MDPI journal article supplement (doi:10.3390/ijerph17197057), 2020-09-27
Supplement: s1 [file s1]

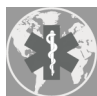

**Part S1.** Questions about the medical history and daily oral hygiene and dental visits

1. Does your child take medication on a daily basis?
  - Yes.
  - No.
  - No answer.
2. Do you have a document for endocarditis prophylaxis for your child?
  - Yes.
  - No.
  - No answer.
3. How long was your child breastfed?
  - Not at all.
  - ≤6 months
  - ≤12 months
  - >12 months
  - No answer.
4. How often does your child brush his/her teeth?
  - Never/not daily.
  - 1/day
  - 2/day
  - >2/day
  - No answer.
5. How does your child brush his/her teeth?
  - Alone.
  - Only parents.
  - Child and parent together.
  - No answer.
6. Does our child receive fluoride supplementation?
  - No.
  - Yes.
    - fluoridated toothpaste
    - fluoridated table salt
    - fluoride tablets
      - o until 1st year of life
      - o until 2nd year of life or longer
      - o to this day
      - o No answer.
  - No answer.
7. How often does your child visit a dentist?
  - Never.
  - Less than 1/year.
  - 1/year
  - 2/year
  - More often.
  - No answer.
8. If no, why not?
  - Lack of time.
  - No need.
  - Child's anxiety.
  - Another reason / no answer.
9. Does a dentist supervise your child's kindergarten?
  - Yes.
  - No.
  - No answer.

**Part S2.** Food Frequency Questionnaire (FFQ). Questions are partly taken from the validated questionnaire from the general health study of children and adolescents (KiGGS). Credits to the Robert Koch-Institute, Berlin, Germany.

- 1a. How often did your child drink milk (including milk for cereals, cocoa)?
  - never
  - 1/month
  - 2-3/month
  - 1-2/week
  - 3-4/week
  - 5-6/week
  - 1/day
  - 2-3/day
  - 4-5/day
  - >5/day
- 1b. When your child drinks milk, how much does he/she drink?
  - ≤¼ glass
  - ½ glass
  - 1 glass (200 mL)
  - 2 glasses
  - ≥3 glasses
- 2a. How often did your child drink soft drinks (e.g. coke, lemonade, iced tea)?
  - never
  - 1/month
  - 2-3/month
  - 1-2/week
- 2b. When your child drinks soft drinks, how much does he/she drink?
  - ≤¼ glass
  - ½ glass
  - 1 glass (200 mL)
  - 2 glasses
  - ≥3 glasses
- 2c. How often were the soft drinks diet products?
  - never
  - ¼ of the consumption
  - ½ of the consumption
  - ¾ of the consumption
  - always
- 3a. How often does your child drink energy drinks?
  - never
  - 1/month
  - 2-3/month
  - 1-2/week

- 3–4/week
  - 5–6/week
  - 1/day
  - 2–3/day
  - 4–5/day
  - >5/day
- 3b. When your child drinks energy drinks, how much does he/she drink?
- $\leq \frac{1}{4}$  glass
  - $\frac{1}{2}$  glass
  - 1 glass (200 mL)
  - 2 glasses
  - $\geq 3$  glasses
- 4a. How often did your child drink fruit or vegetable juices?
- never
  - 1/month
  - 2–3/month
  - 1–2/week
  - 3–4/week
  - 5–6/week
  - 1/day
  - 2–3/day
  - 4–5/day
  - >5/day
- 4b. When your child drinks juices, how much does he/she drink?
- $\leq \frac{1}{4}$  glass
  - $\frac{1}{2}$  glass
  - 1 glass (200 mL)
  - 2 glasses
  - $\geq 3$  glasses
  - $\leq \frac{1}{4}$  glass
  - $\frac{1}{2}$  glass
  - 1 glass (200 mL)
  - 2 glasses
  - $\geq 3$  glasses
- 5a. How often did your child eat fresh fruit?
- never
  - 1/month
  - 2–3/month
  - 1–2/week
  - 3–4/week
  - 5–6/week
  - 1/day
  - 2–3/day
  - 4–5/day
  - >5/day
- 5b. When your child ate fresh fruit, how much did he/she eat?
- $\leq \frac{1}{4}$  portion or  $\frac{1}{4}$  bowl
  - $\frac{1}{2}$  portion or  $\frac{1}{2}$  bowl
  - 1 portion or 1 bowl
  - 2 portions or 2 bowls
  - $\geq 3$  portions or 3 bowls
- 6a. How often did your child eat honey or marmalade?
- never
  - 1/month
  - 2–3/month
  - 1–2/week
  - 3–4/week
  - 5–6/week
  - 1/day
- 2–3/day
  - 4–5/day
  - >5/day
- 6b. When your child ate honey or marmalade, how much did he/she eat?
- $\leq \frac{1}{2}$  teaspoon
  - 1 teaspoon
  - 2 teaspoons
  - 3 teaspoons
  - 4 teaspoons
- 7a. How often did your child eat nut nougat creme?
- never
  - 1/month
  - 2–3/month
  - 1–2/week
  - 3–4/week
  - 5–6/week
  - 1/day
  - 2–3/day
  - 4–5/day
  - >5/day
- 7b. When your child ate nut nougat creme, how much did he/she eat?
- $\leq \frac{1}{2}$  teaspoon
  - 1 teaspoon
  - 2 teaspoons
  - 3 teaspoons
  - 4 teaspoons
- 8a. How often did your child eat cereals or cornflakes?
- never
  - 1/month
  - 2–3/month
  - 1–2/week
  - 3–4/week
  - 5–6/week
  - 1/day
  - 2–3/day
  - 4–5/day
  - >5/day
- 8b. When your child ate cereals or cornflakes, how much did he/she eat?
- $\leq \frac{1}{4}$  bowl
  - $\frac{1}{2}$  bowl
  - 1 bowl
  - 2 bowls
  - $\geq 3$  bowls
- 9a. How often did your child eat ketchup or mayonnaise?
- never
  - 1/month
  - 2–3/month
  - 1–2/week
  - 3–4/week
  - 5–6/week
  - 1/day
  - 2–3/day
  - 4–5/day
  - >5/day
- 9b. When your child ate ketchup or mayonnaise, how much did he/she eat?
- $\leq \frac{1}{2}$  tablespoon
  - 1 tablespoon
  - 2 tablespoons

- 3 tablespoons
  - $\geq 4$  tablespoons
- 10a. How often did your child eat cake or pastries?
- never
  - 1/month
  - 2–3/month
  - 1–2/week
  - 3–4/week
  - 5–6/week
  - 1/day
  - 2–3/day
  - 4–5/day
  - $>5$ /day
- 10b. When your child ate cake or pastries, how much did he/she eat?
- $\leq \frac{1}{4}$  piece of cake
  - $\frac{1}{2}$  piece of cake
  - 1 piece of cake
  - 2 pieces of cake
  - $\geq 3$  pieces of cake
- 11a. How often did your child eat chocolate or chocolate bars?
- never
  - 1/month
  - 2–3/month
  - 1–2/week
  - 3–4/week
  - 5–6/week
  - 1/day
  - 2–3/day
- 11b. When your child ate chocolate or candy bars, how much did he/she eat?
- $\leq \frac{1}{2}$  small candy bar
  - $\frac{1}{4}$  bar of chocolate or 1 small candy bar
  - $\frac{1}{2}$  bar of chocolate or 1 big candy bar
  - 1 bar of chocolate or 2 big candy bars
  - $\geq 2$  chocolate bars
- 12a. How often did your child eat other sweets (chips, gummy bears etc.)?
- never
  - 1/month
  - 2–3/month
  - 1–2/week
  - 3–4/week
  - 5–6/week
  - 1/day
  - 2–3/day
  - 4–5/day
  - $>5$ /day
- 12b. When your child ate sweets, how much did he/she eat?
- 1 piece
  - 2–5 pieces
  - 6–10 pieces
  - 11–20 pieces
  - $\geq 21$  pieces
